# Supplementary material
Source: ML conference proceedings conference paper supplement (https://openreview.net/forum?id=j5Zzb3Rgf0)
Supplement: supplementary_material [file attachment]

Age:

Gender: F / M

Education: Primary / Secondary / Undergraduate / Graduate and higher

|    |                                                                                            | Strongly<br>Disagree |   |   |   | Strongly<br>Agree |
|----|--------------------------------------------------------------------------------------------|----------------------|---|---|---|-------------------|
|    |                                                                                            | 1                    | 2 | 3 | 4 | 5                 |
| 1  | I think that I would like to use this system frequently.                                   |                      |   |   |   |                   |
| 2  | I found the system unnecessarily complex.                                                  |                      |   |   |   |                   |
| 3  | I thought the system was easy to use.                                                      |                      |   |   |   |                   |
| 4  | I think that I would need the support of a technical person to be able to use this system. |                      |   |   |   |                   |
| 5  | I found the various functions in this system were well integrated.                         |                      |   |   |   |                   |
| 6  | I thought there was too much inconsistency in this system.                                 |                      |   |   |   |                   |
| 7  | I would imagine that most people would learn to use this system very quickly.              |                      |   |   |   |                   |
| 8  | I found the system very cumbersome to use.                                                 |                      |   |   |   |                   |
| 9  | I felt very confident using the system.                                                    |                      |   |   |   |                   |
| 10 | I needed to learn a lot of things before I could get going with this system.               |                      |   |   |   |                   |
| 11 | This system spark interest in acquiring knowledge about Hanfu.                             |                      |   |   |   |                   |
| 12 | I lost myself in this experience.                                                          |                      |   |   |   |                   |
| 13 | The time I spent using this system just slipped away.                                      |                      |   |   |   |                   |
| 14 | I was absorbed in this experience.                                                         |                      |   |   |   |                   |
| 15 | I felt frustrated while using this system.                                                 |                      |   |   |   |                   |
| 16 | I found this system confusing to use.                                                      |                      |   |   |   |                   |
| 17 | Using this system was taxing.                                                              |                      |   |   |   |                   |
| 18 | This system was attractive.                                                                |                      |   |   |   |                   |
| 19 | This system was aesthetically appealing.                                                   |                      |   |   |   |                   |
| 20 | This system appealed to my senses.                                                         |                      |   |   |   |                   |
| 21 | Using this system was worthwhile.                                                          |                      |   |   |   |                   |
| 22 | My experience was rewarding.                                                               |                      |   |   |   |                   |
| 23 | I felt interested in this experience.                                                      |                      |   |   |   |                   |

24. Please arrange the following costume images in chronological order:

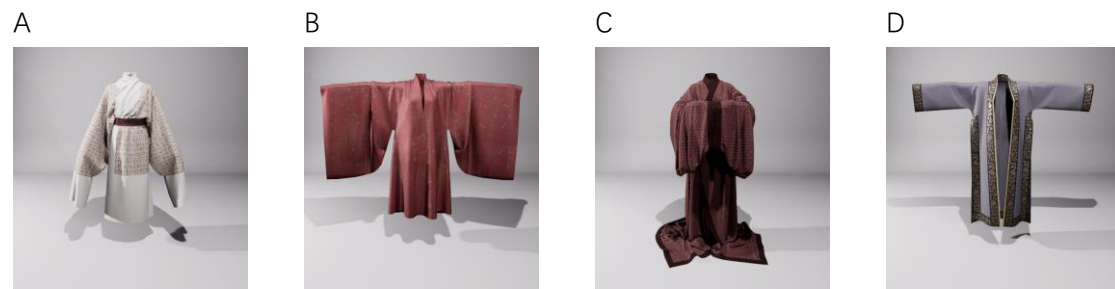

25. Which of the following costume images corresponds to the Song Dynasty?

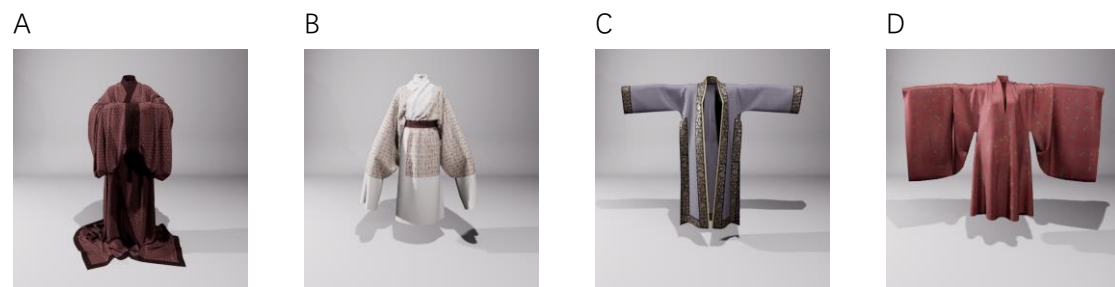

26. Which of the following diagrams does not represent the cross-shaped flat structure?

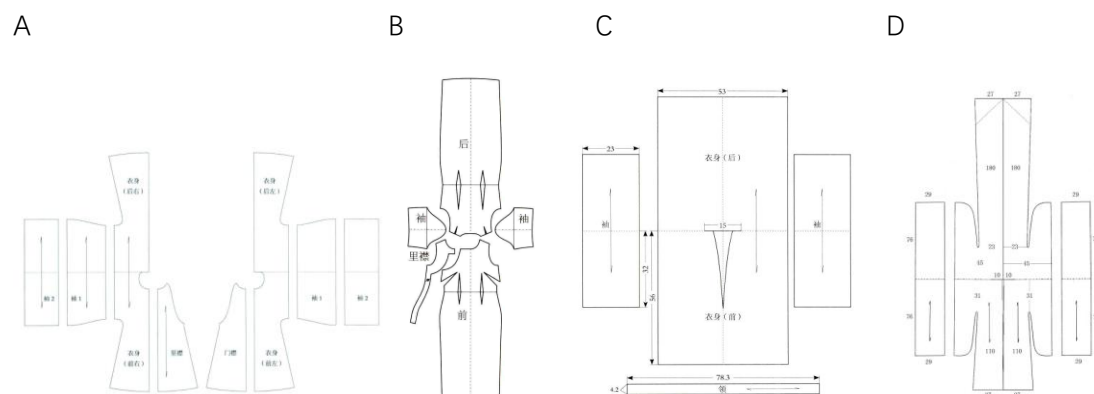

27. According to the Hanfu-making process, please arrange the production process in chronological order:

- Fold the fabric along the center line
- Divide a whole piece of fabric into two pieces
- Cut the fabric into pieces along the dotted line
- Unfold the fabric

28. Which of the following is not the reason for the formation of the cross-shaped flat structure?

- Frugality
- Silk culture
- Precision craftsmanship
- Fabric width
